# Supplementary material for: Body ownership promotes visual awareness
Source: eLife journal article supplement (doi:10.7554/elife.26022), 2017-08-17
Supplement: supp [file elife-26022-supp-v1.zip]

Archive with 1 entries (1 files):
- elife_poa_e26022_Transparent_Reporting_File.pdf
